# Supplementary material
Source: HighWire-hosted journal article supplement (https://www.cmaj.ca/highwire/filestream/57994/field_highwire_adjunct_files/0/are-van-online_appendix_1.pdf)
Supplement: are-van-online_appendix_1.pdf [file are-van-online_appendix_1.pdf]

**Appendix 1: Strategies to search MEDLINE and EMBASE to identify cohort and case-control studies to determine the association between maternal age and risk of stillbirth (page 1 of 3)**

| Search term                                                                                                                                | No. of records returned |
|--------------------------------------------------------------------------------------------------------------------------------------------|-------------------------|
| <b>For MEDLINE</b>                                                                                                                         |                         |
| 1. "Stillbirth-" / all SUBHEADINGS in MIME,MJME,PT                                                                                         | 290                     |
| 2. "Fetal-Death" / all SUBHEADINGS in MIME,MJME,PT                                                                                         | 19 913                  |
| 3. ((still near2 birth*) or stillbirth*) in ti,ab                                                                                          | 5 138                   |
| 4. ((f?etal or f?etus or perinatal*) near4 (death* or mortal* or fatal*)) in ti,ab                                                         | 15 203                  |
| 5. 1 or 2 or 3 or 4                                                                                                                        | 32 484                  |
| 6. ((mother* or childbearing or (child* near3 bear*)) near5 (delay* or later or older or ">/=35" or ">35" or ">/= 35" or "> 35")) in ti,ab | 2 275                   |
| 7. maternal age near5 (">/=35" or ">35" or ">/= 35" or "> 35" or advanc* or increas* or high* or over)                                     | 1 985                   |
| 8. "Maternal-Age" / WITHOUT SUBHEADINGS in MIME,MJME,PT                                                                                    | 12 502                  |
| 9. 6 or 7 or 8                                                                                                                             | 15 027                  |
| 10. 5 and 9                                                                                                                                | 1 806                   |
| 11. "Review-" / WITHOUT SUBHEADINGS in MIME,MJME,PT                                                                                        | 1 268 495               |
| 12. (medline or medlars or embase) in ti,ab,mesh                                                                                           | 25 116                  |
| 13. (scisearch or psychinfo or psycinfo or scopus) in ti,ab,mesh                                                                           | 1 498                   |
| 14. (psychlit or psychlit or cochrane) in ti,ab,mesh                                                                                       | 9 179                   |
| 15. cinahl in ti,ab,mesh                                                                                                                   | 2 416                   |
| 16. ((hand or manual) adj2 search*) in ti,ab,mesh                                                                                          | 201 109                 |
| 17. (electronic database* or bibliographic database* or computerized database* or online database*) in ti,ab,mesh                          | 6 603                   |
| 18. (pooling or pooled or mantel haenszel) in ti,ab,mesh                                                                                   | 26 815                  |
| 19. (peto or dersimonian or der simonian or fixed effect*) in ti,ab,mesh                                                                   | 2 923                   |
| 20. 12 or 13 or 14 or 15 or 16 or 17 or 18 or 19                                                                                           | 257 654                 |
| 21. 11 and 20                                                                                                                              | 38 292                  |
| 22. "Meta-Analysis" / WITHOUT SUBHEADINGS in MIME,MJME,PT                                                                                  | 21 876                  |
| 23. (meta-analys* or meta analys* or metaanalys*) in ti,ab,mesh                                                                            | 22 838                  |
| 24. (systematic* near5 review*) in ti,ab,mesh                                                                                              | 14 245                  |
| 25. (systematic* near5 overview*) in ti,ab,mesh                                                                                            | 376                     |
| 26. (quantitativ* near5 review*) in ti,ab,mesh                                                                                             | 1 038                   |
| 27. (quantitativ* near5 overview*) in ti,ab,mesh                                                                                           | 105                     |
| 28. (quantitativ* near5 synthes*) in ti,ab,mesh                                                                                            | 887                     |
| 29. (methodologic* near5 review*) in ti,ab,mesh                                                                                            | 1 356                   |
| 30. (methodologic* near5 overview*) in ti,ab,mesh                                                                                          | 108                     |
| 31. (integrative research review* or research integration) in ti,ab,mesh                                                                   | 56                      |
| 32. 22 or 23 or 24 or 25 or 26 or 27 or 28 or 29 or 30 or 31                                                                               | 41 053                  |
| 33. 21 or 32                                                                                                                               | 71 240                  |
| 34. (5 and 9) and (21 or 32)                                                                                                               | 15                      |
| 35. explode "Cohort-Studies" / WITHOUT SUBHEADINGS in MIME,MJME,PT                                                                         | 610 449                 |
| 36. cohort in ti,ab                                                                                                                        | 96 371                  |
| 37. "Controlled-Clinical-Trial" / WITHOUT SUBHEADINGS in MIME,MJME,PT                                                                      | 74 631                  |
| 38. "Epidemiologic-Methods" / all SUBHEADINGS in MIME,MJME,PT                                                                              | 20 326                  |
| 39. ("Epidemiologic-Methods" / all SUBHEADINGS in MIME,MJME,PT) and (PY:MEDS = 1966-1989)                                                  | 11 197                  |
| 40. explode "Case-Control-Studies" / WITHOUT SUBHEADINGS in MIME,MJME,PT                                                                   | 347 125                 |
| 41. (case* and control*) in ti,ab                                                                                                          | 190 488                 |

*continued*

**Appendix 1: Strategies to search MEDLINE and EMBASE to identify cohort and case-control studies to determine the association between maternal age and risk of stillbirth (page 2 of 3)**

| Search term                                                                                                                            | No. of records returned |
|----------------------------------------------------------------------------------------------------------------------------------------|-------------------------|
| 42. (((odds or risk or hazard) near2 ratio*) or "rr" or "ors") in ti,ab                                                                | 97 697                  |
| 43. (prospective or retrospective or cross-sectional or cross sectional or population-based or population based) in ti,ab              | 411 948                 |
| 44. 35 or 36 or 37 or 38 or 39 or 40 or 41 or 42 or 43                                                                                 | 1 308 601               |
| 45. (5 and 9) and 44                                                                                                                   | 660                     |
| <b>For EMBASE</b>                                                                                                                      |                         |
| 1. stillbirth/                                                                                                                         | 3 538                   |
| 2. fetus death/                                                                                                                        | 4 825                   |
| 3. ((still adj2 birth\$) or stillbirth\$).tw                                                                                           | 3 544                   |
| 4. ((f?etal or f?etus or perinatal\$) adj4 (death\$ or mortal\$ or fatal\$)).tw                                                        | 6 367                   |
| 5. 1 or 2 or 3 or 4                                                                                                                    | 14 823                  |
| 6. ((mother\$ or childbearing or (child\$ adj3 bear\$)) adj5 (delay\$ or later or older or ">/=35" or ">35" or ">/= 35" or "> 35")).tw | 1 724                   |
| 7. (maternal age adj5 (">/=35" or ">35" or ">/= 35" or "> 35" or advanc\$ or increas\$ or high\$ or over)).tw                          | 1 725                   |
| 8. maternal age/                                                                                                                       | 6 286                   |
| 9. 6 or 7 or 8                                                                                                                         | 8 269                   |
| 10. 5 and 9                                                                                                                            | 722                     |
| 11. exp review/                                                                                                                        | 817 060                 |
| 12. (medline or medlars or embase).ti,ab,sh                                                                                            | 22 881                  |
| 13. (scisearch or psychinfo or psycinfo).ti,ab,sh                                                                                      | 1 481                   |
| 14. (psychlit or psyclit).ti,ab,sh                                                                                                     | 404                     |
| 15. cinahl.ti,ab,sh                                                                                                                    | 1 084                   |
| 16. ((hand adj2 search\$) or (manual\$ adj search\$)).tw                                                                               | 1 870                   |
| 17. ((electronic adj database\$) or (bibliographic adj database\$)).tw                                                                 | 1 900                   |
| 18. ((pooled adj analys\$) or pooling).tw                                                                                              | 4 575                   |
| 19. (peto or dersimonian or (fixed adj effect) or mantel haenszel).tw                                                                  | 1 873                   |
| 20. or/12-19                                                                                                                           | 30 622                  |
| 21. 11 and 20                                                                                                                          | 14 178                  |
| 22. exp meta analysis/                                                                                                                 | 31 028                  |
| 23. meta?analy\$.tw,sh                                                                                                                 | 31 494                  |
| 24. (systematic\$ adj5 review\$).tw,sh                                                                                                 | 20 375                  |
| 25. (systematic\$ adj5 overview\$).tw,sh                                                                                               | 362                     |
| 26. (quantitative\$ adj5 review\$).tw,sh                                                                                               | 7 832                   |
| 27. (quantitative\$ adj5 overview\$).tw,sh                                                                                             | 105                     |
| 28. (methodologic\$ adj5 review\$).tw,sh                                                                                               | 1 277                   |
| 29. (methodologic\$ adj5 overview\$).tw,sh                                                                                             | 109                     |
| 30. ((integrative adj5 research adj5 review\$) or (research adj5 integration)).tw                                                      | 460                     |
| 31. (quantitative\$ adj5 synthesis\$).tw,sh                                                                                            | 1 271                   |
| 32. or/22-31                                                                                                                           | 54 216                  |
| 33. 21 or 32                                                                                                                           | 62 994                  |
| 34. 10 and 33                                                                                                                          | 8                       |
| 35. exp cohort analysis/                                                                                                               | 42 579                  |

*continued*

**Appendix 1: Strategies to search MEDLINE and EMBASE to identify cohort and case-control studies to determine the association between maternal age and risk of stillbirth (page 3 of 3)**

| Search term                                                                                                         | No. of records returned |
|---------------------------------------------------------------------------------------------------------------------|-------------------------|
| 36. exp longitudinal study/                                                                                         | 15 625                  |
| 37. exp prospective study/                                                                                          | 66 232                  |
| 38. exp follow up/                                                                                                  | 227 350                 |
| 39. cohort\$.tw                                                                                                     | 97 137                  |
| 40. exp case control study/                                                                                         | 15 929                  |
| 41. (case\$ and control\$).tw                                                                                       | 165 057                 |
| 42. (((odds or risk or hazard) adj2 ratio\$) or "rr" or "ors").tw                                                   | 86 602                  |
| 43. (prospective or retrospective or cross-sectional or cross sectional or population-based or population based).tw | 366 717                 |
| 44. or/35-43                                                                                                        | 800 577                 |
| 45. 10 and 44                                                                                                       | 330                     |
